# Supplementary material for: Identifying Potential Machine Learning Algorithms for the Simulation of Binding Affinities to Molecularly Imprinted Polymers
Source: MDPI journal article supplement (doi:10.3390/computation9100103), 2021-09-24
Supplement: s1 [file s1]

# \*\*\*Supplementary Information\*\*\*

## Identifying Potential Machine Learning Algorithms for the Simulation of Binding Affinities to Molecularly Imprinted Polymers

Joseph W. Lowdon <sup>1\*</sup>, Hikaru Ishikura <sup>2</sup>, Malene K. Kvernenes <sup>2</sup>, Manlio Caldara <sup>1</sup>, Thomas J. Cleij <sup>1</sup> and Bart van Grinsven <sup>1</sup>, Kasper Eersels <sup>1</sup>, Hanne Diliën <sup>1</sup>

<sup>1</sup> Sensor Engineering Department, Faculty of Science and Engineering, Maastricht University, PO Box 616, 6200 MD Maastricht, the Netherlands

<sup>2</sup> Maastricht Science Programme, Faculty of Science and Engineering, Maastricht University, PO Box 616, 6200 MD Maastricht, the Netherlands

\* Correspondence: Joseph Lowdon: joe.lowdon@maastrichtuniversity.nl

**Supplementary Table S1. MIP training data set**

| Molecule           | SMILE                                                         | C <sub>i</sub> / mM | C <sub>f</sub> / mM | S <sub>b</sub> / μmol g <sup>-1</sup> |
|--------------------|---------------------------------------------------------------|---------------------|---------------------|---------------------------------------|
| 2-methoxyphenidine | COc1ccccc1C(Cc2ccccc2)N3CCCCC3 0.1                            | 0.1                 | 5.89                | 24.25494                              |
| caffeine           | CN1C=NC2=C1C(=O)N(C(=O)N2C)C 0.1                              | 0.1                 | 102.63              | -0.65789                              |
| paracetamol        | CC(=O)NC1=CC=C(C=C1)O 0.1                                     | 0.1                 | 67.83               | 8.04315                               |
| sucrose            | OCC2OC(OC1(CO)OC(CO)C(O)C1O)C(O)C(O)C2O 0.1                   | 0.1                 | 51.58               | 12.10526                              |
| aspirin            | CC(=O)Oc1ccccc1C(=O)O 0.1                                     | 0.1                 | 52.63               | 11.84211                              |
| crystal violet     | CN(C)c3ccc(C(c1ccc(N(C)C)cc1)=c2ccc(=[N+](C)C)cc2)cc3         | 0.1                 | 0                   | 2.5                                   |
| basic blue         | CCNc3ccc(C(c1ccc(N(CC)CC)cc1)=c2ccc(=[N+](CC)CC)cc2)c4ccccc34 | 0.1                 | 0                   | 2.5                                   |
| methyl orange      | CN(C)c2ccc(/N=N/c1ccc(S(=O)(=O)[O-])cc1)cc2                   | 0.1                 | 8.99                | 0.02533                               |
| phenol red         | O=S(=O)([O-])c3ccc(C(c1ccc(O)cc1)=c2ccc(=[OH+])cc2)cc3        | 0.1                 | 7.87E-01            | 0.05315                               |
| 4-methoxyphenidine | COc3ccc(C(Cc1ccccc1)N2CCCCC2)cc3 0.1                          | 0.1                 | 70.88               | 7.28047                               |
| ephedrine          | CCNC(Cc1ccccc1)c2ccccc2                                       | 0.1                 | 385.83              | 28.542                                |
| 2-methoxyephedrine | CCNC(Cc1ccccc1)c2ccccc2OC                                     | 0.1                 | 370.65              | 32.3367                               |
| 4-methoxyephedrine | CCNC(Cc1ccccc1)c2ccc(OC)cc2                                   | 0.1                 | 220.36              | 69.9111                               |
| 2-methoxyphenidine | COc1ccccc1C(Cc2ccccc2)N3CCCCC3 0.1                            | 0.2                 | 0.0107              | 46.85651                              |
| caffeine           | CN1C=NC2=C1C(=O)N(C(=O)N2C)C 0.1                              | 0.2                 | 0.18684             | 3.2569                                |
| paracetamol        | CC(=O)NC1=CC=C(C=C1)O 0.1                                     | 0.2                 | 0.15915             | 10.11039                              |
| sucrose            | OCC2OC(OC1(CO)OC(CO)C(O)C1O)C(O)C(O)C2O 0.1                   | 0.2                 | 0.11579             | 20.84419                              |
| aspirin            | CC(=O)Oc1ccccc1C(=O)O 0.1                                     | 0.2                 | 0.09474             | 26.05524                              |
| crystal violet     | CN(C)c3ccc(C(c1ccc(N(C)C)cc1)=c2ccc(=[N+](C)C)cc2)cc3         | 0.2                 | 1.09E-04            | 0.47279                               |
| basic blue         | CCNc3ccc(C(c1ccc(N(CC)CC)cc1)=c2ccc(=[N+](CC)CC)cc2)c4ccccc34 | 0.2                 | 0                   | 5                                     |
| methyl orange      | CN(C)c2ccc(/N=N/c1ccc(S(=O)(=O)[O-])cc1)cc2                   | 0.2                 | 0.0018              | 0.04935                               |
| phenol red         | O=S(=O)([O-])c3ccc(C(c1ccc(O)cc1)=c2ccc(=[OH+])cc2)cc3        | 0.2                 | 0.00169             | 0.07677                               |
| 4-methoxyphenidine | COc3ccc(C(Cc1ccccc1)N2CCCCC2)cc3 0.1                          | 0.2                 | 0.15945             | 10.13785                              |
| ephedrine          | CCNC(Cc1ccccc1)c2ccccc2                                       | 0.2                 | 0.17309             | 6.7266                                |
| 2-methoxyephedrine | CCNC(Cc1ccccc1)c2ccccc2OC                                     | 0.2                 | 0.12073             | 19.81764                              |
| 4-methoxyephedrine | CCNC(Cc1ccccc1)c2ccc(OC)cc2                                   | 0.2                 | 0.0712              | 32.2                                  |
| 2-methoxyphenidine | COc1ccccc1C(Cc2ccccc2)N3CCCCC3                                | 0.3                 | 0.01815             | 69.42034                              |
| caffeine           | CN1C=NC2=C1C(=O)N(C(=O)N2C)C                                  | 0.3                 | 0.27368             | 6.48172                               |
| paracetamol        | CC(=O)NC1=CC=C(C=C1)O                                         | 0.3                 | 0.25262             | 11.6707                               |
| sucrose            | OCC2OC(OC1(CO)OC(CO)C(O)C1O)C(O)C(O)C2O                       | 0.3                 | 0.15263             | 36.29764                              |
| aspirin            | CC(=O)Oc1ccccc1C(=O)O                                         | 0.3                 | 0.16684             | 32.79751                              |
| crystal violet     | CN(C)c3ccc(C(c1ccc(N(C)C)cc1)=c2ccc(=[N+](C)C)cc2)cc3         | 0.3                 | 1.14E-04            | 0.72138                               |
| basic blue         | CCNc3ccc(C(c1ccc(N(CC)CC)cc1)=c2ccc(=[N+](CC)CC)cc2)c4ccccc34 | 0.3                 | 0                   | 7.5                                   |
| methyl orange      | CN(C)c2ccc(/N=N/c1ccc(S(=O)(=O)[O-])cc1)cc2                   | 0.3                 | 0.0026              | 0.0995                                |
| phenol red         | O=S(=O)([O-])c3ccc(C(c1ccc(O)cc1)=c2ccc(=[OH+])cc2)cc3        | 0.3                 | 0.00274             | 0.06524                               |
| 4-methoxyphenidine | COc3ccc(C(Cc1ccccc1)N2CCCCC2)cc3                              | 0.3                 | 0.17443             | 31.39314                              |
| ephedrine          | CCNC(Cc1ccccc1)c2ccccc2                                       | 0.3                 | 0.25845             | 10.38778                              |
| 2-methoxyephedrine | CCNC(Cc1ccccc1)c2ccccc2OC                                     | 0.3                 | 0.1981              | 25.47605                              |
| 4-methoxyephedrine | CCNC(Cc1ccccc1)c2ccc(OC)cc2                                   | 0.3                 | 0.11573             | 46.06667                              |
| 2-methoxyphenidine | COc1ccccc1C(Cc2ccccc2)N3CCCCC3                                | 0.4                 | 0.02699             | 95.1557                               |
| caffeine           | CN1C=NC2=C1C(=O)N(C(=O)N2C)C                                  | 0.4                 | 0.36895             | 7.92159                               |
| paracetamol        | CC(=O)NC1=CC=C(C=C1)O                                         | 0.4                 | 0.34608             | 13.75513                              |

|                    |                                                                            |     |          |          |
|--------------------|----------------------------------------------------------------------------|-----|----------|----------|
| sucrose            | <chem>OCC2OC(OC1(CO)OC(CO)C(O)C1O)C(O)C(O)C2O</chem>                       | 0.4 | 0.26263  | 35.04296 |
| aspirin            | <chem>CC(=O)Oc1ccccc1C(=O)O</chem>                                         | 0.4 | 0.26053  | 35.58002 |
| crystal violet     | <chem>CN(C)c3ccc(C(c1ccc(N(C)C)cc1)=c2ccc(=[N+](C)C)cc2)cc3</chem>         | 0.4 | 1.22E-04 | 0.96951  |
| basic blue         | <chem>CCNc3ccc(C(c1ccc(N(CC)CC)cc1)=c2ccc(=[N+](CC)CC)cc2)c4ccccc34</chem> | 0.4 | 2.95E-04 | 12.42634 |
| methyl orange      | <chem>CN(C)c2ccc(/N=N/c1ccc(S(=O)(=O)[O-])cc1)cc2</chem>                   | 0.4 | 0.00348  | 0.13005  |
| phenol red         | <chem>O=S(=O)([O-])c3ccc(C(c1ccc(O)cc1)=c2ccc(=[OH+])cc2)cc3</chem>        | 0.4 | 0.00371  | 0.0734   |
| 4-methoxyphenidine | <chem>COc3ccc(C(Cc1ccccc1)N2CCCCC2)cc3</chem>                              | 0.4 | 0.2096   | 47.60122 |
| ephedrine          | <chem>CCNC(Cc1ccccc1)c2ccccc2</chem>                                       | 0.4 | 0.29354  | 26.61395 |
| 2-methoxyphenidine | <chem>CCNC(Cc1ccccc1)c2ccccc2OC</chem>                                     | 0.4 | 0.30059  | 24.8528  |
| 4-methoxyphenidine | <chem>CCNC(Cc1ccccc1)c2ccc(OC)cc2</chem>                                   | 0.4 | 0.17084  | 57.28889 |
| 2-methoxyphenidine | <chem>COc1ccccc1C(Cc2ccccc2)N3CCCCC3</chem>                                | 0.5 | 0.03571  | 115.4961 |
| caffeine           | <chem>CN1C=NC2=C1C(=O)N(C(=O)N2C)C</chem>                                  | 0.5 | 0.46895  | 7.72454  |
| paracetamol        | <chem>CC(=O)NC1=CC=C(C=C1)O</chem>                                         | 0.5 | 0.44008  | 14.90624 |
| sucrose            | <chem>OCC2OC(OC1(CO)OC(CO)C(O)C1O)C(O)C(O)C2O</chem>                       | 0.5 | 0.32105  | 44.51427 |
| aspirin            | <chem>CC(=O)Oc1ccccc1C(=O)O</chem>                                         | 0.5 | 0.33211  | 41.76486 |
| crystal violet     | <chem>CN(C)c3ccc(C(c1ccc(N(C)C)cc1)=c2ccc(=[N+](C)C)cc2)cc3</chem>         | 0.5 | 1.56E-04 | 1.21106  |
| basic blue         | <chem>CCNc3ccc(C(c1ccc(N(CC)CC)cc1)=c2ccc(=[N+](CC)CC)cc2)c4ccccc34</chem> | 0.5 | 0.00787  | 18.03348 |
| methyl orange      | <chem>CN(C)c2ccc(/N=N/c1ccc(S(=O)(=O)[O-])cc1)cc2</chem>                   | 0.5 | 0.00439  | 0.15146  |
| phenol red         | <chem>O=S(=O)([O-])c3ccc(C(c1ccc(O)cc1)=c2ccc(=[OH+])cc2)cc3</chem>        | 0.5 | 0.00467  | 0.08296  |
| 4-methoxyphenidine | <chem>COc3ccc(C(Cc1ccccc1)N2CCCCC2)cc3</chem>                              | 0.5 | 0.25768  | 60.58016 |
| ephedrine          | <chem>CCNC(Cc1ccccc1)c2ccccc2</chem>                                       | 0.5 | 0.38583  | 28.54203 |
| 2-methoxyphenidine | <chem>CCNC(Cc1ccccc1)c2ccccc2OC</chem>                                     | 0.5 | 0.37065  | 32.33665 |
| 4-methoxyphenidine | <chem>CCNC(Cc1ccccc1)c2ccc(OC)cc2</chem>                                   | 0.5 | 0.22036  | 69.91111 |

**Supplementary Table S2. NIP training data set**

| Molecule           | SMILE                                                                      | C <sub>i</sub> / mM | C <sub>f</sub> / mM | S <sub>b</sub> / μmol g <sup>-1</sup> |
|--------------------|----------------------------------------------------------------------------|---------------------|---------------------|---------------------------------------|
| 2-methoxyphenidine | <chem>COc1ccccc1C(Cc2ccccc2)N3CCCCC3</chem>                                | 0.1                 | 0.01178             | 21.20633                              |
| caffeine           | <chem>CN1C=NC2=C1C(=O)N(C(=O)N2C)C</chem>                                  | 0.1                 | 0.19684             | 0.78947                               |
| paracetamol        | <chem>CC(=O)NC1=CC=C(C=C1)O</chem>                                         | 0.1                 | 0.0753              | 6.17389                               |
| sucrose            | <chem>OCC2OC(OC1(CO)OC(CO)C(O)C1O)C(O)C(O)C2O</chem>                       | 0.1                 | 0.04737             | 13.15789                              |
| aspirin            | <chem>CC(=O)Oc1ccccc1C(=O)O</chem>                                         | 0.1                 | 0.05789             | 10.52632                              |
| crystal violet     | <chem>CN(C)c3ccc(C(c1ccc(N(C)C)cc1)=c2ccc(=[N+](C)C)cc2)cc3</chem>         | 0.1                 | 8.44E-05            | 0.22889                               |
| basic blue         | <chem>CCNc3ccc(C(c1ccc(N(CC)CC)cc1)=c2ccc(=[N+](CC)CC)cc2)c4ccccc34</chem> | 0.1                 | 0                   | 2.5                                   |
| methyl orange      | <chem>CN(C)c2ccc(/N=N/c1ccc(S(=O)(=O)[O-])cc1)cc2</chem>                   | 0.1                 | 7.00E-04            | 0.07496                               |
| phenol red         | <chem>O=S(=O)([O-])c3ccc(C(c1ccc(O)cc1)=c2ccc(=[OH+])cc2)cc3</chem>        | 0.1                 | 7.71E-04            | 0.05737                               |
| 4-methoxyphenidine | <chem>COc3ccc(C(Cc1ccccc1)N2CCCCC2)cc3</chem>                              | 0.1                 | 0.01631             | 20.92351                              |
| ephedrine          | <chem>CCNC(Cc1ccccc1)c2ccccc2</chem>                                       | 0.1                 | 0.12101             | 19.7479                               |
| 2-methoxyphenidine | <chem>CCNC(Cc1ccccc1)c2ccccc2OC</chem>                                     | 0.1                 | 0.06646             | 58.38509                              |
| 4-methoxyphenidine | <chem>CCNC(Cc1ccccc1)c2ccc(OC)cc2</chem>                                   | 0.1                 | 0.00522             | 23.69506                              |
| 2-methoxyphenidine | <chem>COc1ccccc1C(Cc2ccccc2)N3CCCCC3</chem>                                | 0.2                 | 0.02416             | 42.47235                              |
| caffeine           | <chem>CN1C=NC2=C1C(=O)N(C(=O)N2C)C</chem>                                  | 0.2                 | 0.28947             | 2.63158                               |
| paracetamol        | <chem>CC(=O)NC1=CC=C(C=C1)O</chem>                                         | 0.2                 | 0.15915             | 10.21149                              |
| sucrose            | <chem>OCC2OC(OC1(CO)OC(CO)C(O)C1O)C(O)C(O)C2O</chem>                       | 0.2                 | 0.10526             | 23.68421                              |
| aspirin            | <chem>CC(=O)Oc1ccccc1C(=O)O</chem>                                         | 0.2                 | 0.1                 | 25                                    |
| crystal violet     | <chem>CN(C)c3ccc(C(c1ccc(N(C)C)cc1)=c2ccc(=[N+](C)C)cc2)cc3</chem>         | 0.2                 | 1.11E-04            | 0.47232                               |
| basic blue         | <chem>CCNc3ccc(C(c1ccc(N(CC)CC)cc1)=c2ccc(=[N+](CC)CC)cc2)c4ccccc34</chem> | 0.2                 | 0                   | 5                                     |
| methyl orange      | <chem>CN(C)c2ccc(/N=N/c1ccc(S(=O)(=O)[O-])cc1)cc2</chem>                   | 0.2                 | 0.0013              | 0.17605                               |
| phenol red         | <chem>O=S(=O)([O-])c3ccc(C(c1ccc(O)cc1)=c2ccc(=[OH+])cc2)cc3</chem>        | 0.2                 | 0.0017              | 0.07396                               |
| 4-methoxyphenidine | <chem>COc3ccc(C(Cc1ccccc1)N2CCCCC2)cc3</chem>                              | 0.2                 | 0.07264             | 31.84109                              |
| ephedrine          | <chem>CCNC(Cc1ccccc1)c2ccccc2</chem>                                       | 0.2                 | 0.09076             | 52.31092                              |
| 2-methoxyphenidine | <chem>CCNC(Cc1ccccc1)c2ccccc2OC</chem>                                     | 0.2                 | 0.14472             | 63.81988                              |
| 4-methoxyphenidine | <chem>CCNC(Cc1ccccc1)c2ccc(OC)cc2</chem>                                   | 0.2                 | 0.06264             | 34.34075                              |
| 2-methoxyphenidine | <chem>COc1ccccc1C(Cc2ccccc2)N3CCCCC3</chem>                                | 0.3                 | 0.03859             | 67.72254                              |
| caffeine           | <chem>CN1C=NC2=C1C(=O)N(C(=O)N2C)C</chem>                                  | 0.3                 | 0.38421             | 3.88903                               |
| paracetamol        | <chem>CC(=O)NC1=CC=C(C=C1)O</chem>                                         | 0.3                 | 0.25742             | 10.64409                              |
| sucrose            | <chem>OCC2OC(OC1(CO)OC(CO)C(O)C1O)C(O)C(O)C2O</chem>                       | 0.3                 | 0.15789             | 35.52632                              |
| aspirin            | <chem>CC(=O)Oc1ccccc1C(=O)O</chem>                                         | 0.3                 | 0.16842             | 32.89474                              |
| crystal violet     | <chem>CN(C)c3ccc(C(c1ccc(N(C)C)cc1)=c2ccc(=[N+](C)C)cc2)cc3</chem>         | 0.3                 | 1.16E-04            | 0.72092                               |
| basic blue         | <chem>CCNc3ccc(C(c1ccc(N(CC)CC)cc1)=c2ccc(=[N+](CC)CC)cc2)c4ccccc34</chem> | 0.3                 | 0                   | 7.5                                   |
| methyl orange      | <chem>CN(C)c2ccc(/N=N/c1ccc(S(=O)(=O)[O-])cc1)cc2</chem>                   | 0.3                 | 0.00224             | 0.19093                               |
| phenol red         | <chem>O=S(=O)([O-])c3ccc(C(c1ccc(O)cc1)=c2ccc(=[OH+])cc2)cc3</chem>        | 0.3                 | 0.00271             | 0.07227                               |
| 4-methoxyphenidine | <chem>COc3ccc(C(Cc1ccccc1)N2CCCCC2)cc3</chem>                              | 0.3                 | 0.08449             | 53.87637                              |
| ephedrine          | <chem>CCNC(Cc1ccccc1)c2ccccc2</chem>                                       | 0.3                 | 0.22185             | 44.53782                              |
| 2-methoxyphenidine | <chem>CCNC(Cc1ccccc1)c2ccccc2OC</chem>                                     | 0.3                 | 0.24845             | 62.8882                               |
| 4-methoxyphenidine | <chem>CCNC(Cc1ccccc1)c2ccc(OC)cc2</chem>                                   | 0.3                 | 0.09082             | 52.29408                              |
| 2-methoxyphenidine | <chem>COc1ccccc1C(Cc2ccccc2)N3CCCCC3</chem>                                | 0.4                 | 0.05476             | 85.0343                               |
| caffeine           | <chem>CN1C=NC2=C1C(=O)N(C(=O)N2C)C</chem>                                  | 0.4                 | 0.47684             | 5.78947                               |
| paracetamol        | <chem>CC(=O)NC1=CC=C(C=C1)O</chem>                                         | 0.4                 | 0.34875             | 12.62309                              |
| sucrose            | <chem>OCC2OC(OC1(CO)OC(CO)C(O)C1O)C(O)C(O)C2O</chem>                       | 0.4                 | 0.26316             | 33.70495                              |
| aspirin            | <chem>CC(=O)Oc1ccccc1C(=O)O</chem>                                         | 0.4                 | 0.25789             | 35.0013                               |
| crystal violet     | <chem>CN(C)c3ccc(C(c1ccc(N(C)C)cc1)=c2ccc(=[N+](C)C)cc2)cc3</chem>         | 0.4                 | 1.18E-04            | 0.97045                               |

|                    |                                                               |     |          |          |
|--------------------|---------------------------------------------------------------|-----|----------|----------|
| basic blue         | CCNc3ccc(C(c1ccc(N(CC)CC)cc1)=c2ccc(=[N+])(CC)CC)cc2)c4cccc34 | 0.4 | 1.07E-04 | 12.47321 |
| methyl orange      | CN(C)c2ccc(/N=N/c1ccc(S(=O)(=O)[O-])cc1)cc2                   | 0.4 | 0.00319  | 0.20189  |
| phenol red         | O=S(=O)([O-])c3ccc(C(c1ccc(O)cc1)=c2ccc(=[OH+])cc2)cc3        | 0.4 | 0.00364  | 0.08886  |
| 4-methoxyphenidine | COc3ccc(C(Cc1cccc1)N2CCCCC2)cc3                               | 0.4 | 0.15565  | 61.08805 |
| ephenidine         | CCNC(Cc1cccc1)c2cccc2                                         | 0.4 | 0.25882  | 60.29412 |
| 2-methoxyphenidine | CCNC(Cc1cccc1)c2cccc2OC                                       | 0.4 | 0.46522  | 33.03495 |
| 4-methoxyphenidine | CCNC(Cc1cccc1)c2ccc(OC)cc2                                    | 0.4 | 0.21192  | 47.01952 |
| 2-methoxyphenidine | COc1cccc1C(Cc2cccc2)N3CCCCC3                                  | 0.5 | 0.0877   | 98.63604 |
| caffeine           | CN1C=NC2=C1C(=O)N(C(=O)N2C)C                                  | 0.5 | 0.55632  | 10.70691 |
| paracetamol        | CC(=O)NC1=CC=C(C=C1)O                                         | 0.5 | 0.44115  | 14.71374 |
| sucrose            | OCC2OC(OC1(CO)OC(CO)C(O)C1O)C(O)C(O)C2O                       | 0.5 | 0.33158  | 42.10526 |
| aspirin            | CC(=O)Oc1cccc1C(=O)O                                          | 0.5 | 0.33684  | 40.78947 |
| crystal violet     | CN(C)c3ccc(C(c1ccc(N(C)C)cc1)=c2ccc(=[N+])(C)CC)cc3           | 0.5 | 1.58E-04 | 1.2106   |
| basic blue         | CCNc3ccc(C(c1ccc(N(CC)CC)cc1)=c2ccc(=[N+])(CC)CC)cc2)c4cccc34 | 0.5 | 0.00135  | 19.66295 |
| methyl orange      | CN(C)c2ccc(/N=N/c1ccc(S(=O)(=O)[O-])cc1)cc2                   | 0.5 | 0.00409  | 0.22853  |
| phenol red         | O=S(=O)([O-])c3ccc(C(c1ccc(O)cc1)=c2ccc(=[OH+])cc2)cc3        | 0.5 | 0.00457  | 0.10686  |
| 4-methoxyphenidine | COc3ccc(C(Cc1cccc1)N2CCCCC2)cc3                               | 0.5 | 0.28313  | 54.21731 |
| ephenidine         | CCNC(Cc1cccc1)c2cccc2                                         | 0.5 | 0.39328  | 50.66733 |
| 2-methoxyphenidine | CCNC(Cc1cccc1)c2cccc2OC                                       | 0.5 | 0.3559   | 86.02484 |
| 4-methoxyphenidine | CCNC(Cc1cccc1)c2ccc(OC)cc2                                    | 0.5 | 0.24115  | 64.71187 |

**Supplementary Table S3. MIP testing data set**

| Molecule    | SMILE                              | C <sub>i</sub> / mM | C <sub>f</sub> / mM | S <sub>b</sub> / μmol g <sup>-1</sup> |
|-------------|------------------------------------|---------------------|---------------------|---------------------------------------|
| 3-MXP       | COc3ccc(C(Cc1cccc1)N2CCCCC2)c3 0.1 | 0.1                 | 35.75               | 16.06232                              |
| Diphenidine | c3ccc(CC(c1cccc1)N2CCCCC2)cc3 0.1  | 0.1                 | 77.83               | 5.54237                               |
| 3-MEPE      | CCNC(Cc1cccc1)c2cccc(OC)c2         | 0.1                 | 331.93              | 15.5798                               |
| 3-MXP       | COc3ccc(C(Cc1cccc1)N2CCCCC2)c3 0.1 | 0.2                 | 0.06604             | 33.48929                              |
| Diphenidine | c3ccc(CC(c1cccc1)N2CCCCC2)cc3 0.1  | 0.2                 | 0.16827             | 7.9322                                |
| 3-MEPE      | CCNC(Cc1cccc1)c2cccc(OC)c2         | 0.2                 | 0.07211             | 31.97227                              |
| 3-MXP       | COc3ccc(C(Cc1cccc1)N2CCCCC2)c3     | 0.3                 | 0.10893             | 47.76708                              |
| Diphenidine | c3ccc(CC(c1cccc1)N2CCCCC2)cc3      | 0.3                 | 0.21559             | 21.10169                              |
| 3-MEPE      | CCNC(Cc1cccc1)c2cccc(OC)c2         | 0.3                 | 0.12196             | 44.50876                              |
| 3-MXP       | COc3ccc(C(Cc1cccc1)N2CCCCC2)c3     | 0.4                 | 0.1577              | 60.57525                              |
| Diphenidine | c3ccc(CC(c1cccc1)N2CCCCC2)cc3      | 0.4                 | 0.23607             | 40.98305                              |
| 3-MEPE      | CCNC(Cc1cccc1)c2cccc(OC)c2         | 0.4                 | 0.26118             | 34.70545                              |
| 3-MXP       | COc3ccc(C(Cc1cccc1)N2CCCCC2)c3     | 0.5                 | 0.2157              | 71.07402                              |
| Diphenidine | c3ccc(CC(c1cccc1)N2CCCCC2)cc3      | 0.5                 | 0.31878             | 45.30508                              |
| 3-MEPE      | CCNC(Cc1cccc1)c2cccc(OC)c2         | 0.5                 | 0.33193             | 42.01771                              |
| 3-MXP       | COc3ccc(C(Cc1cccc1)N2CCCCC2)c3 0.1 | 0.1                 | 35.75               | 16.06232                              |
| Diphenidine | c3ccc(CC(c1cccc1)N2CCCCC2)cc3 0.1  | 0.1                 | 77.83               | 5.54237                               |
| 3-MEPE      | CCNC(Cc1cccc1)c2cccc(OC)c2         | 0.1                 | 331.93              | 15.5798                               |
| 3-MXP       | COc3ccc(C(Cc1cccc1)N2CCCCC2)c3 0.1 | 0.2                 | 0.06604             | 33.48929                              |
| Diphenidine | c3ccc(CC(c1cccc1)N2CCCCC2)cc3 0.1  | 0.2                 | 0.16827             | 7.9322                                |
| 3-MEPE      | CCNC(Cc1cccc1)c2cccc(OC)c2         | 0.2                 | 0.07211             | 31.97227                              |
| 3-MXP       | COc3ccc(C(Cc1cccc1)N2CCCCC2)c3     | 0.3                 | 0.10893             | 47.76708                              |
| Diphenidine | c3ccc(CC(c1cccc1)N2CCCCC2)cc3      | 0.3                 | 0.21559             | 21.10169                              |
| 3-MEPE      | CCNC(Cc1cccc1)c2cccc(OC)c2         | 0.3                 | 0.12196             | 44.50876                              |
| 3-MXP       | COc3ccc(C(Cc1cccc1)N2CCCCC2)c3     | 0.4                 | 0.1577              | 60.57525                              |
| Diphenidine | c3ccc(CC(c1cccc1)N2CCCCC2)cc3      | 0.4                 | 0.23607             | 40.98305                              |
| 3-MEPE      | CCNC(Cc1cccc1)c2cccc(OC)c2         | 0.4                 | 0.26118             | 34.70545                              |
| 3-MXP       | COc3ccc(C(Cc1cccc1)N2CCCCC2)c3     | 0.5                 | 0.2157              | 71.07402                              |
| Diphenidine | c3ccc(CC(c1cccc1)N2CCCCC2)cc3      | 0.5                 | 0.31878             | 45.30508                              |
| 3-MEPE      | CCNC(Cc1cccc1)c2cccc(OC)c2         | 0.5                 | 0.33193             | 42.01771                              |

**Supplementary Table S4. NIP testing data set**

| Molecule    | SMILE                              | C <sub>i</sub> / mM | C <sub>f</sub> / mM | S <sub>b</sub> / μmol g <sup>-1</sup> |
|-------------|------------------------------------|---------------------|---------------------|---------------------------------------|
| 3-MXP       | COc3ccc(C(Cc1cccc1)N2CCCCC2)c3 0.1 | 0.1                 | 0.05416             | 11.45973                              |
| Diphenidine | c3ccc(CC(c1cccc1)N2CCCCC2)cc3 0.1  | 0.1                 | 0.09503             | 1.24327                               |
| 3-MEPE      | CCNC(Cc1cccc1)c2cccc(OC)c2         | 0.1                 | 0.05592             | 11.01974                              |
| 3-MXP       | COc3ccc(C(Cc1cccc1)N2CCCCC2)c3 0.1 | 0.2                 | 0.09667             | 25.83134                              |
| Diphenidine | c3ccc(CC(c1cccc1)N2CCCCC2)cc3 0.1  | 0.2                 | 0.11086             | 22.28381                              |
| 3-MEPE      | CCNC(Cc1cccc1)c2cccc(OC)c2         | 0.2                 | 0.08355             | 2.91E+01                              |
| 3-MXP       | COc3ccc(C(Cc1cccc1)N2CCCCC2)c3     | 0.3                 | 0.11007             | 47.48267                              |
| Diphenidine | c3ccc(CC(c1cccc1)N2CCCCC2)cc3      | 0.3                 | 0.18055             | 29.86221                              |
| 3-MEPE      | CCNC(Cc1cccc1)c2cccc(OC)c2         | 0.3                 | 0.14539             | 38.65132                              |
| 3-MXP       | COc3ccc(C(Cc1cccc1)N2CCCCC2)c3     | 0.4                 | 0.14385             | 64.0382                               |

|             |                                      |     |         |          |
|-------------|--------------------------------------|-----|---------|----------|
| Diphenidine | c3ccc(CC(c1ccccc1)N2CCCCC2)cc3       | 0.4 | 0.31992 | 20.01901 |
| 3-MEPE      | CCNC(Cc1ccccc1)c2cccc(OC)c2          | 0.4 | 0.20461 | 48.84868 |
| 3-MXP       | COc3cccc(C(Cc1ccccc1)N2CCCCC2)c3     | 0.5 | 0.26032 | 59.91934 |
| Diphenidine | c3ccc(CC(c1ccccc1)N2CCCCC2)cc3       | 0.5 | 0.19639 | 75.90276 |
| 3-MEPE      | CCNC(Cc1ccccc1)c2cccc(OC)c2          | 0.5 | 0.29671 | 50.82237 |
| 3-MXP       | COc3cccc(C(Cc1ccccc1)N2CCCCC2)c3 0.1 | 0.1 | 0.05416 | 11.45973 |
| Diphenidine | c3ccc(CC(c1ccccc1)N2CCCCC2)cc3 0.1   | 0.1 | 0.09503 | 1.24327  |
| 3-MEPE      | CCNC(Cc1ccccc1)c2cccc(OC)c2          | 0.1 | 0.05592 | 11.01974 |
| 3-MXP       | COc3cccc(C(Cc1ccccc1)N2CCCCC2)c3 0.1 | 0.2 | 0.09667 | 25.83134 |
| Diphenidine | c3ccc(CC(c1ccccc1)N2CCCCC2)cc3 0.1   | 0.2 | 0.11086 | 22.28381 |
| 3-MEPE      | CCNC(Cc1ccccc1)c2cccc(OC)c2          | 0.2 | 0.08355 | 2.91E+01 |
| 3-MXP       | COc3cccc(C(Cc1ccccc1)N2CCCCC2)c3     | 0.3 | 0.11007 | 47.48267 |
| Diphenidine | c3ccc(CC(c1ccccc1)N2CCCCC2)cc3       | 0.3 | 0.18055 | 29.86221 |
| 3-MEPE      | CCNC(Cc1ccccc1)c2cccc(OC)c2          | 0.3 | 0.14539 | 38.65132 |
| 3-MXP       | COc3cccc(C(Cc1ccccc1)N2CCCCC2)c3     | 0.4 | 0.14385 | 64.0382  |
| Diphenidine | c3ccc(CC(c1ccccc1)N2CCCCC2)cc3       | 0.4 | 0.31992 | 20.01901 |
| 3-MEPE      | CCNC(Cc1ccccc1)c2cccc(OC)c2          | 0.4 | 0.20461 | 48.84868 |
| 3-MXP       | COc3cccc(C(Cc1ccccc1)N2CCCCC2)c3     | 0.5 | 0.26032 | 59.91934 |
| Diphenidine | c3ccc(CC(c1ccccc1)N2CCCCC2)cc3       | 0.5 | 0.19639 | 75.90276 |
| 3-MEPE      | CCNC(Cc1ccccc1)c2cccc(OC)c2          | 0.5 | 0.29671 | 50.82237 |
